# Supplementary material
Source: MDPI journal article supplement (https://www.mdpi.com/1424-8247/13/12/430)

# **Hepatic Tumor Cell Morphology Plasticity Under Physical Constraints in 3D Cultures driven by YAP-mTOR Axis**

**Adam Frtús<sup>1</sup>, Barbora Smolková<sup>1</sup>, Mariia Uzhytchak<sup>1</sup>, Mariia Lunova<sup>1,2</sup>, Milan Jirsa<sup>2</sup>, Martin Hof<sup>3</sup>, Piotr Jurkiewicz<sup>3</sup>, Vladimir I. Lozinsky<sup>4</sup>, Lucie Wolfová<sup>5,6</sup>, Yuriy Petrenko<sup>5</sup>, Šárka Kubinová<sup>1,5</sup>, Alexandr Dejneka<sup>1,\*</sup> and Oleg Lunov<sup>1,\*</sup>**

<sup>1</sup> Department of Optical and Biophysical Systems, Institute of Physics of the Czech Academy of Sciences, Prague, 18221, Czech Republic; frtus@fzu.cz (A.F.); smolkova@fzu.cz (B.S.); uzhytchak@fzu.cz (M.U.); dejneka@fzu.cz (A.D.); lunov@fzu.cz (O.L.)

<sup>2</sup> Institute for Clinical & Experimental Medicine (IKEM), Prague, 14021, Czech Republic; mariialunova@gmail.com (M.L.); miji@ikem.cz (M.J.)

<sup>3</sup> J. Heyrovský Institute of Physical Chemistry of the Czech Academy of Sciences, Prague, 18223, Czech Republic; martin.hof@jh-inst.cas.cz (M.H.); piotr.jurkiewicz@jh-inst.cas.cz (P.J.)

<sup>4</sup> A.N. Nesmeyanov Institute of Organoelement Compounds, Russian Academy of Sciences, Vavilov Street, 28, 119991 Moscow, Russia; loz@ineos.ac.ru (V.I.L.)

<sup>5</sup> Department of Biomaterials and Biophysical Methods, Institute of Experimental Medicine of the Czech Academy of Sciences, Prague, 14220, Czech Republic; yuriy.petrenko@iem.cas.cz (Y.P.); sarka.kubinova@iem.cas.cz (S.K.)

<sup>6</sup> Department of Tissue Engineering, Contipro a.s., Dolní Dobruška, Czech Republic; lucie.wolfova@iem.cas.cz (L.W.)

\* Correspondence: dejneka@fzu.cz; Tel.: +420-2660-52141; lunov@fzu.cz; Tel.: +420-2660-52131

## Supplementary Tables

**Table S1** List of chemicals probes used in the study.

| Reagent                                       | Manufacturer             | Catalogue  |
|-----------------------------------------------|--------------------------|------------|
| PBS                                           | Gibco                    | 10010015   |
| Triton-X100                                   | PanReac AppliChem        | A4975,0100 |
| Micro BCA Protein Assay Kit                   | Thermo Fisher Scientific | 23235      |
| RIPA buffer                                   | Millipore                | 20188      |
| Protease Inhibitor Cocktail                   | Sigma Aldrich            | P8340-1ML  |
| Phosphatase Inhibitor Cocktail 3              | Sigma Aldrich            | P0044-1ML  |
| Paraformaldehyde                              | VWR                      | 100503-917 |
| YAP1 Silencer Select                          | Ambion                   | 4392421    |
| Negative control #1 siRNA<br>Silencer Select  | Ambion                   | 4390844    |
| Lipofectamine 3000 Reagent                    | Thermo Fisher Scientific | L3000-008  |
| Opti-MEM                                      | Thermo Fisher Scientific | 31985-062  |
| BSA                                           | Sigma Aldrich            | 2153       |
| Blotting-Grade Blocker                        | Bio-Rad                  | 170-6404   |
| Clarity Max ECL Western<br>Blotting Substrate | Bio-Rad                  | 1705062    |

**Table S2** List of fluorescent probes used in the study.

| Reagent                                 | Manufacturer                    | Catalogue |
|-----------------------------------------|---------------------------------|-----------|
| CellMask orange                         | Thermo Fisher Scientific        | C10045    |
| CellMask green                          | Thermo Fisher Scientific        | C37608    |
| Propidium Iodide                        | Thermo Fisher Scientific        | R37108    |
| Hoechst 33342                           | Thermo Fisher Scientific        | 62249     |
| ColF                                    | ImmunoChemistry<br>Technologies | 6346      |
| ActinGreen™ 488<br>ReadyProbes™ Reagent | Thermo Fisher Scientific        | R37110    |

**Table S3** List of antibodies used in the study.

| Antibody               | Clone/catalogue<br>number | Dilution |         | Manufacturer              |
|------------------------|---------------------------|----------|---------|---------------------------|
|                        |                           | WB       | IF      |                           |
| Anti-YAP               | D8H1X/14074               | 1: 1000  | 1:100   | Cell Signaling Technology |
| Anti-LC3A/B            | D3U4C/12741               | 1: 1000  | 1:100   | Cell Signaling Technology |
| Anti-pmTOR             | Ser2448/2971S             | 1: 1000  | 1:100   | Cell Signaling Technology |
| Anti- $\beta$ -Tubulin | D2N5G/ 15115              | 1: 1000  | 1:100   | Cell Signaling Technology |
| Anti- $\beta$ -actin   | 8H10D10/ 3700             | 1: 1000  | N.A.    | Cell Signaling Technology |
| Anti-Ki67              | Ab15580                   | N.A.     | 1: 1000 | Abcam                     |
| Anti-PCNA              | EPR3821/ab92552           | 1: 1000  | N.A.    | Abcam                     |
| Anti-GAPDH             | ab226408                  | 1:1000   | N.A.    | Abcam                     |
| Anti-GAPDH             | ABS16                     | 1:1000   | N.A.    | Merck                     |

|                                        |         |          |        |                          |
|----------------------------------------|---------|----------|--------|--------------------------|
| Anti- mouse-HRP                        | 1858413 | 1:10 000 | N.A.   | Pierce Biotechnology     |
| Anti-rabbit- HRP                       | 1858415 | 1:10 000 | N.A.   | Pierce Biotechnology     |
| AlexaFluor 568 goat<br>anti-rabbit IgG | A-11011 | N.A.     | 1:1000 | Thermo Fisher Scientific |

NA – not applicable; WB – western blot; IF – immunofluorescence.

## Supplementary Figures

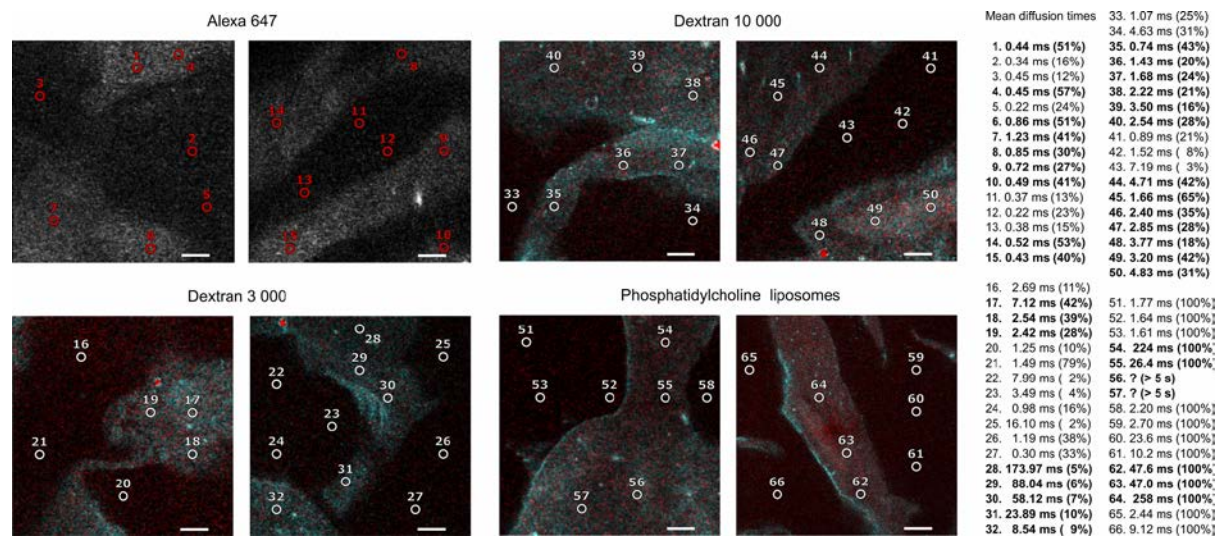

**Figure S1.** Analysis of the diffusivity of Alexa 647, Alexa 488-dextran and liposomes labeled with Bodipy-lipid analog in collagen scaffolds assessed by Fluorescence Correlation Spectroscopy (FCS). Pseudocolor images show Alexa 647 fluorescence in red and the fluorescence of Alexa 488-dextran and Bodipy-lipid in cyan. Diffusion parameter obtained for the selected points are given in the table on the right hand side.

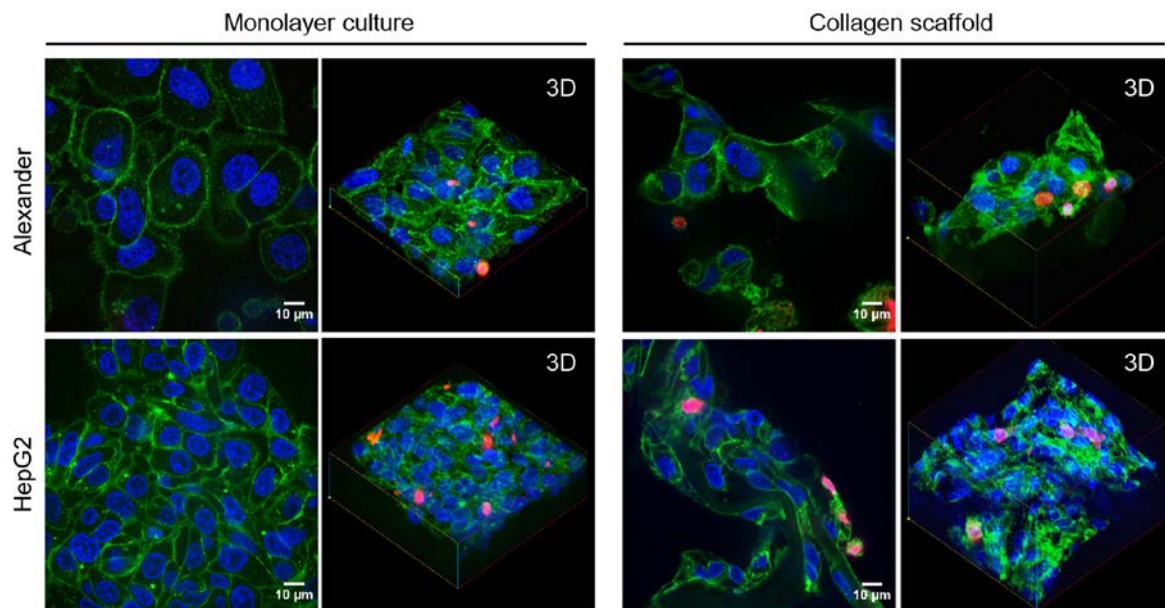

**Figure S2.** Hepatic cell size and plasticity under culturing in collagen scaffolds confocal analysis. HepG2 and Alexander cells were grown either in standard monolayer culture or in collagen scaffolds. Cell membranes were labeled with CellMask™ Green (green) and propidium iodide (red), as dead cell stain. Hoechst 33342 (blue) dye was used to counterstain nuclei. Labeled cells were then imaged by confocal microscopy, and the images were processed using ImageJ software (NIH). 3D reconstruction was done in ImageJ software (NIH).

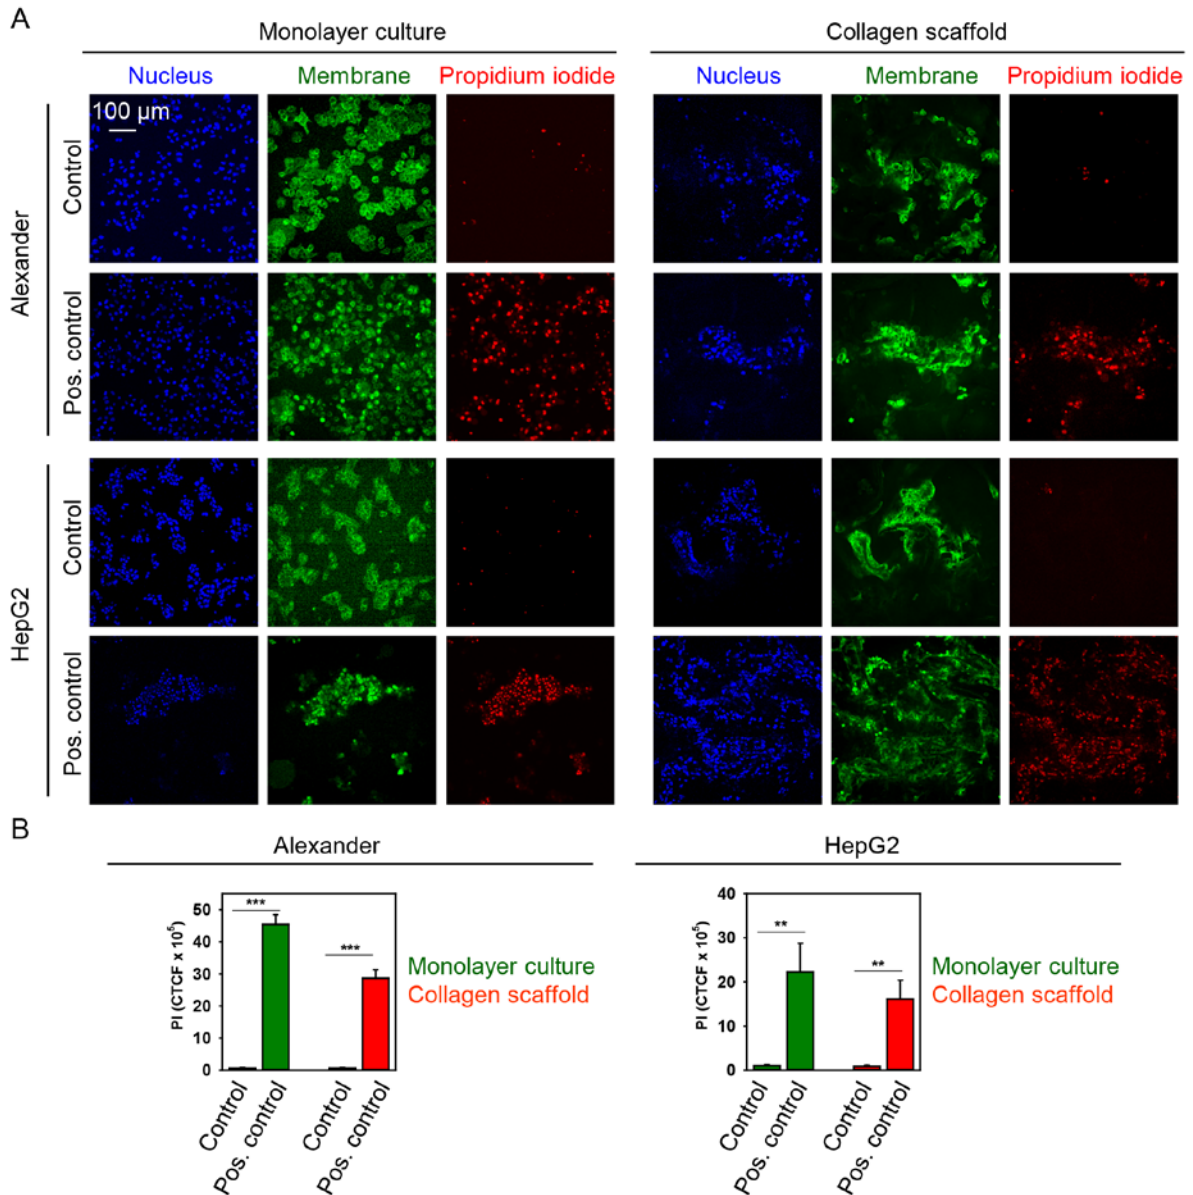

**Figure S3.** Analysis of ethanol toxicosis of cells grown in collagen scaffolds. HepG2 and Alexander cells were grown either in standard monolayer culture or in collagen scaffolds. Cells were labeled with CellMask™ Green (green), as membrane stain, and propidium iodide (PI, red), as dead cell stain. Hoechst 33342 (blue) dye was used to counterstain nuclei. Control cells were untreated. As a positive control, cells were treated with 20% ethanol for 60 min. Labeled cells were then imaged by confocal microscopy. ImageJ software (NIH) was used for image processing (**A**) and quantification of PI (**B**).



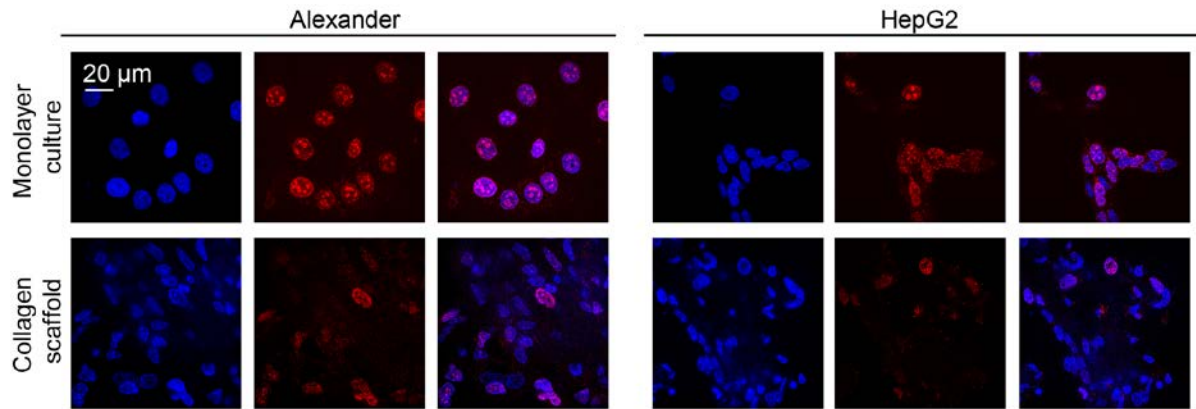

**Figure S4.** Immunofluorescence confocal microscopy of Ki-67 stained HepG2 and Alexander cells. Cells were grown either in standard monolayer culture or in collagen scaffolds, then fixed, permeabilized and stained for Ki-67 (red). Hoechst 33342 (blue) dye was used to counterstain nuclei. Labeled cells were then imaged by confocal microscopy, and the images were processed using ImageJ software (NIH).

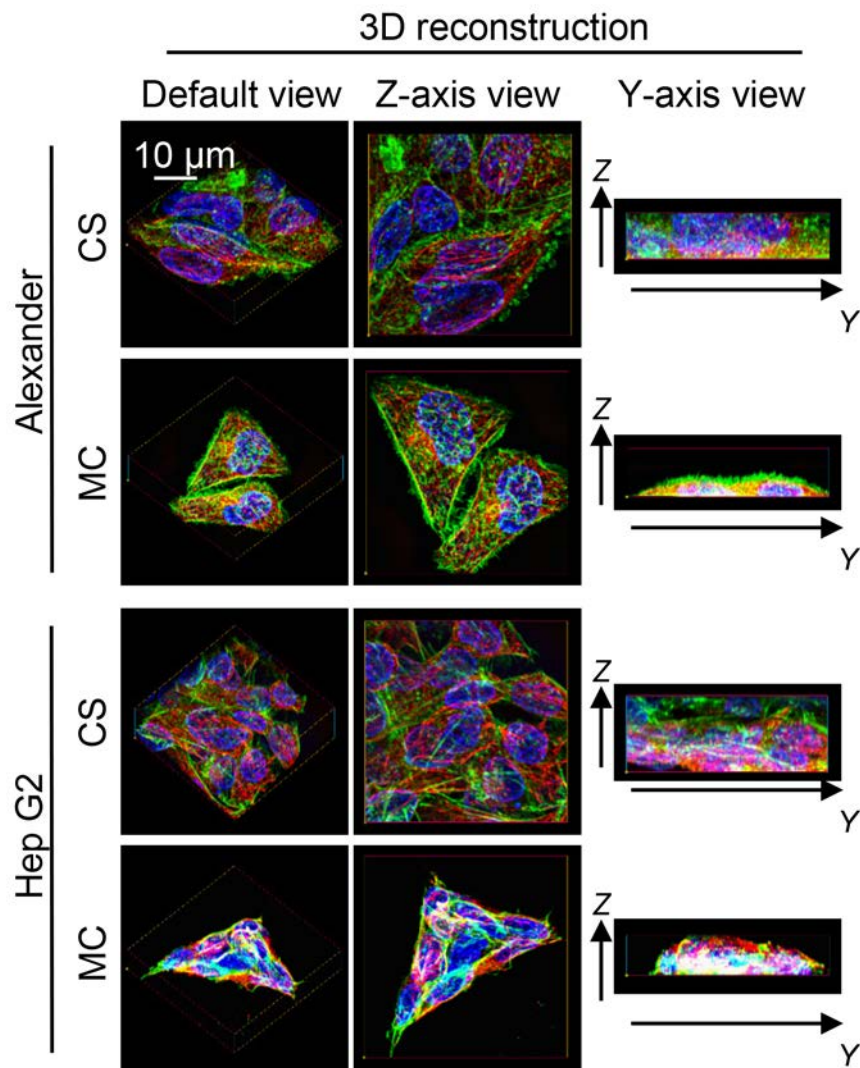

**Figure S5.** 3D reconstruction of cytoskeleton remodeling under culturing in collagen scaffolds. Cells were grown either in standard monolayer culture or in collagen scaffolds,

then fixed, permeabilized and stained for F-actin (green) and tubulin (red). Hoechst 33342 (blue) dye was used to counterstain nuclei. Labeled cells were then imaged by confocal microscopy, and the image was processed using ImageJ software (NIH). 3D reconstruction was done in ImageJ software (NIH).

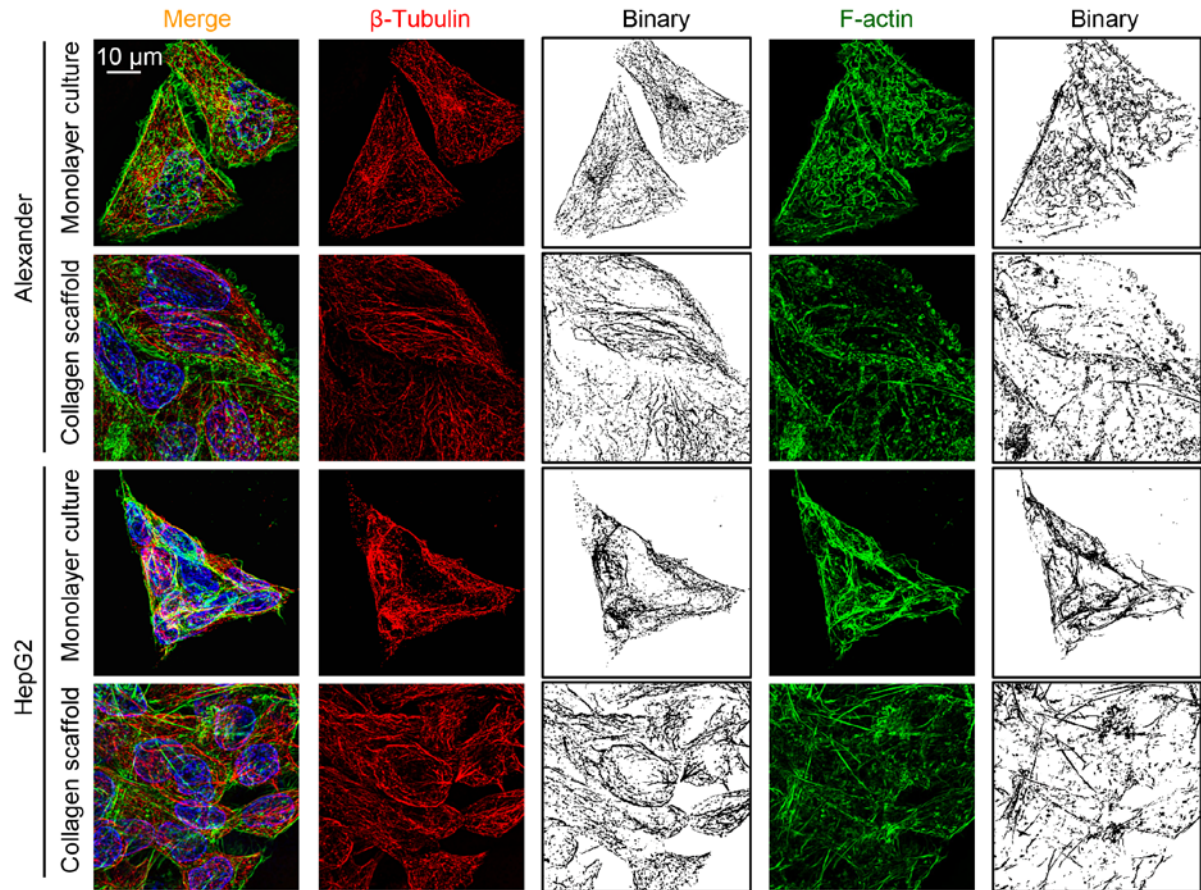

**Figure S6.** Maximum intensity projections of cytoskeleton remodeling under culturing in collagen scaffolds. Cells were grown either in standard monolayer culture or in collagen scaffolds, then fixed, permeabilized and stained for F-actin (green) and tubulin (red). Hoechst 33342 (blue) dye was used to counterstain nuclei. Labeled cells were then imaged by confocal microscopy, and the image was processed using ImageJ software (NIH). Binarization was done using ImageJ software (NIH).

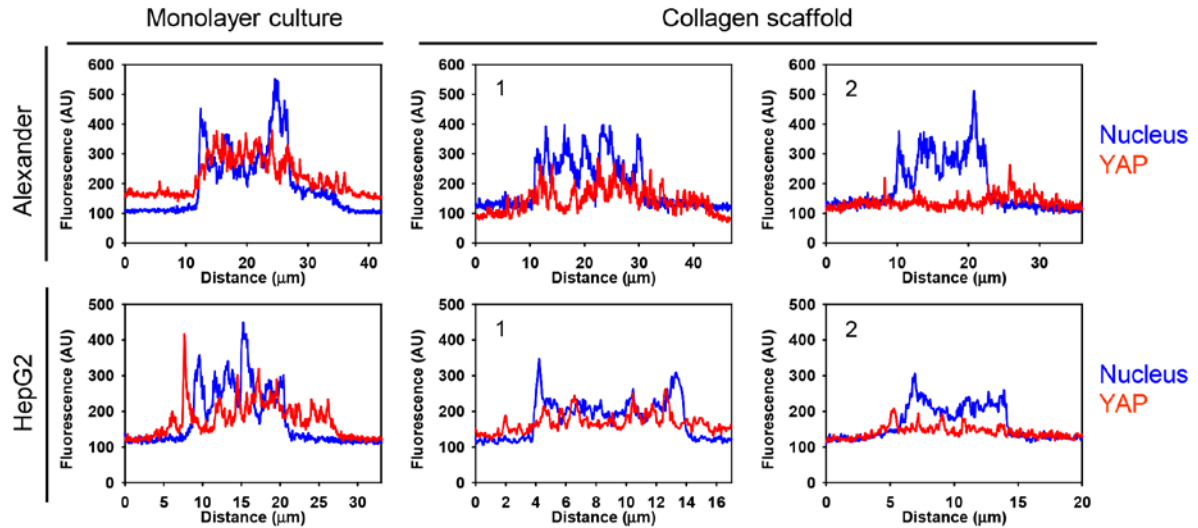

**Figure S7.** Sub-cellular localization of YAP under culturing in collagen scaffolds. Representative linescans of confocal microscopic images shown in Figure 4D.

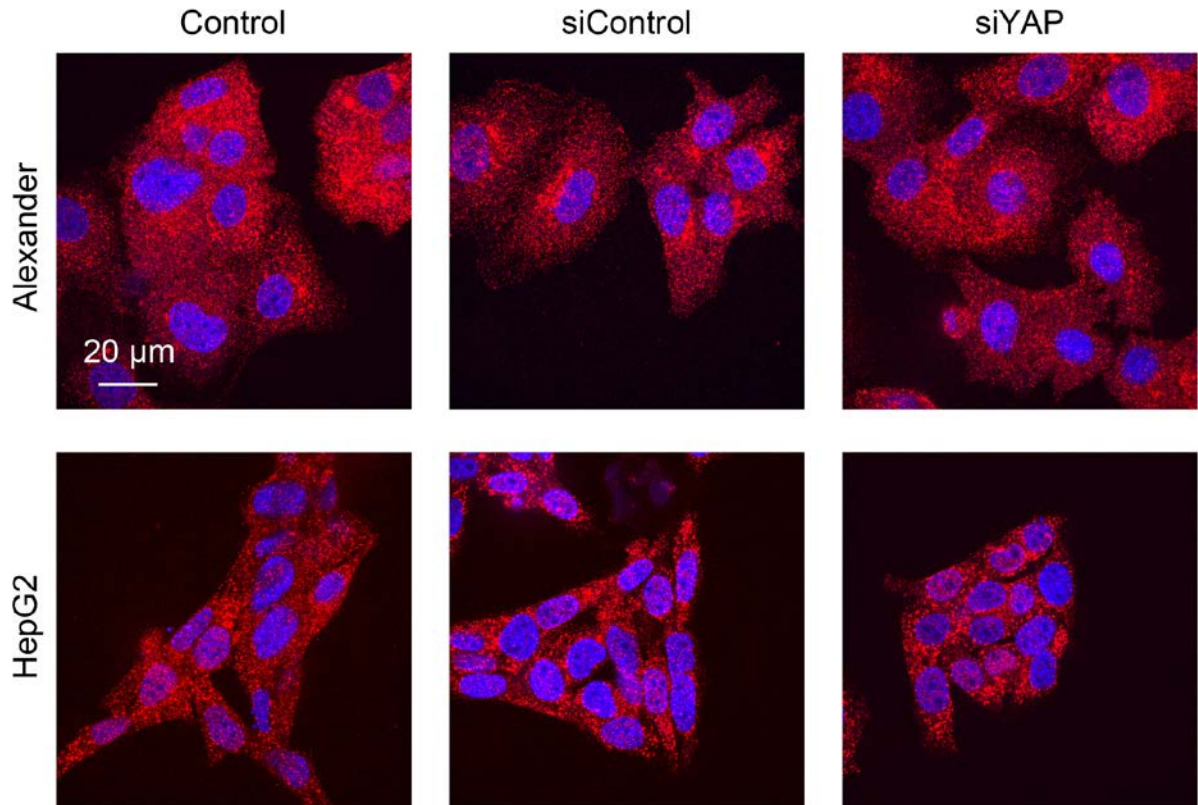

**Figure S8.** Sub-cellular distribution of pmTOR upon YAP siRNA transfection. Immunostaining analysis for pmTOR (red) in Alexander and HepG2 cells transfected with YAP siRNA for 48 h. Hoechst 33342 (blue) dye was used to counterstain nuclei. Labeled cells were then imaged by confocal microscopy, and the image was processed using ImageJ software (NIH). Representative confocal microscopic images.



## Uncropped immunoblot scans

Figure 2F

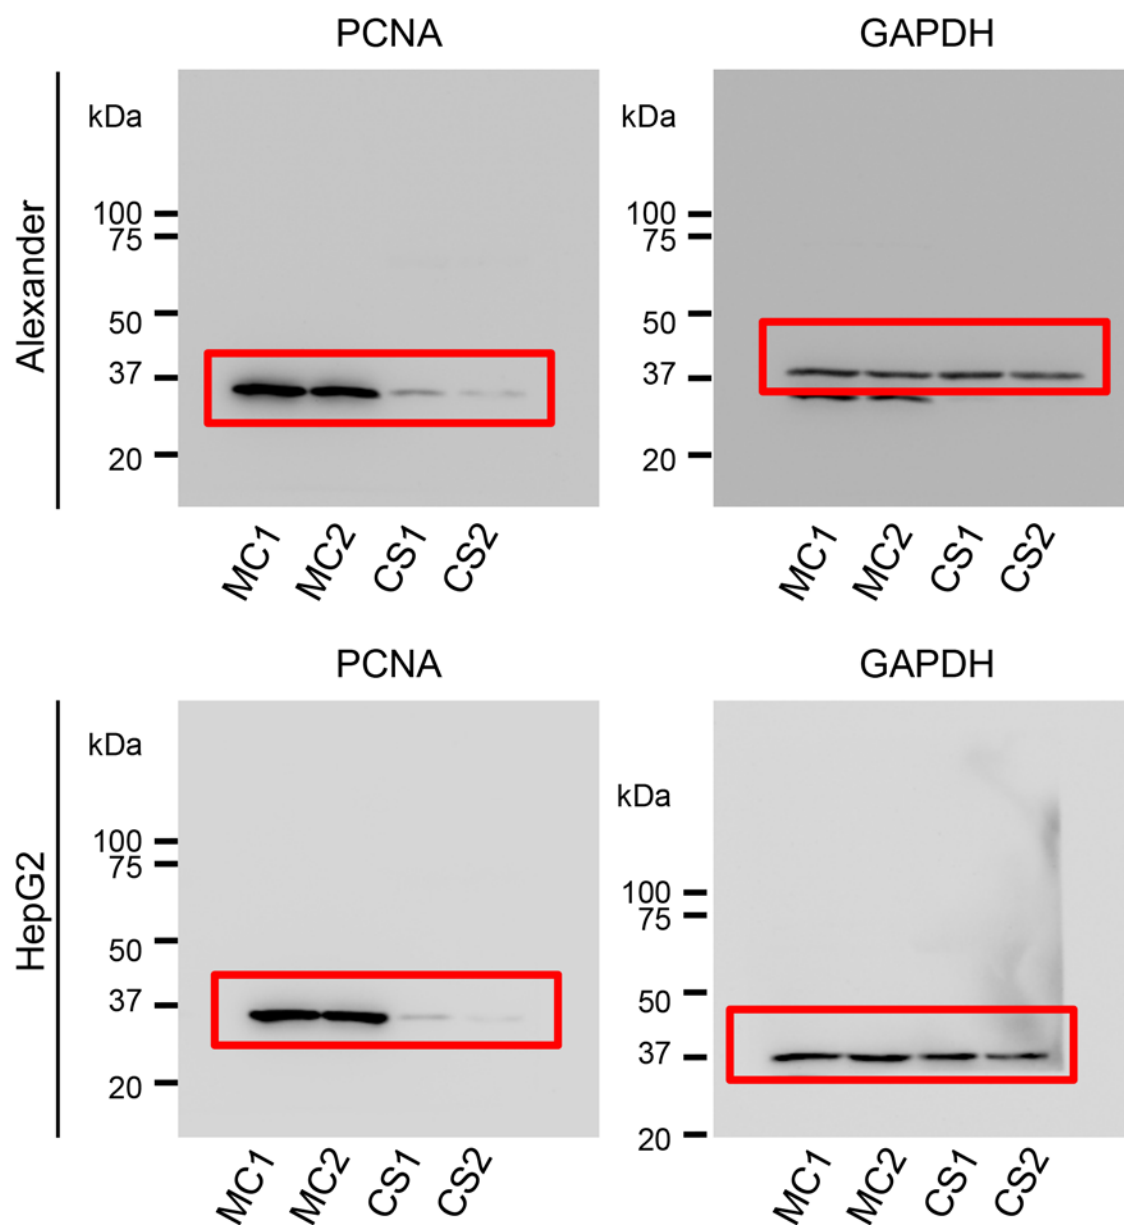

**Figure 3F**

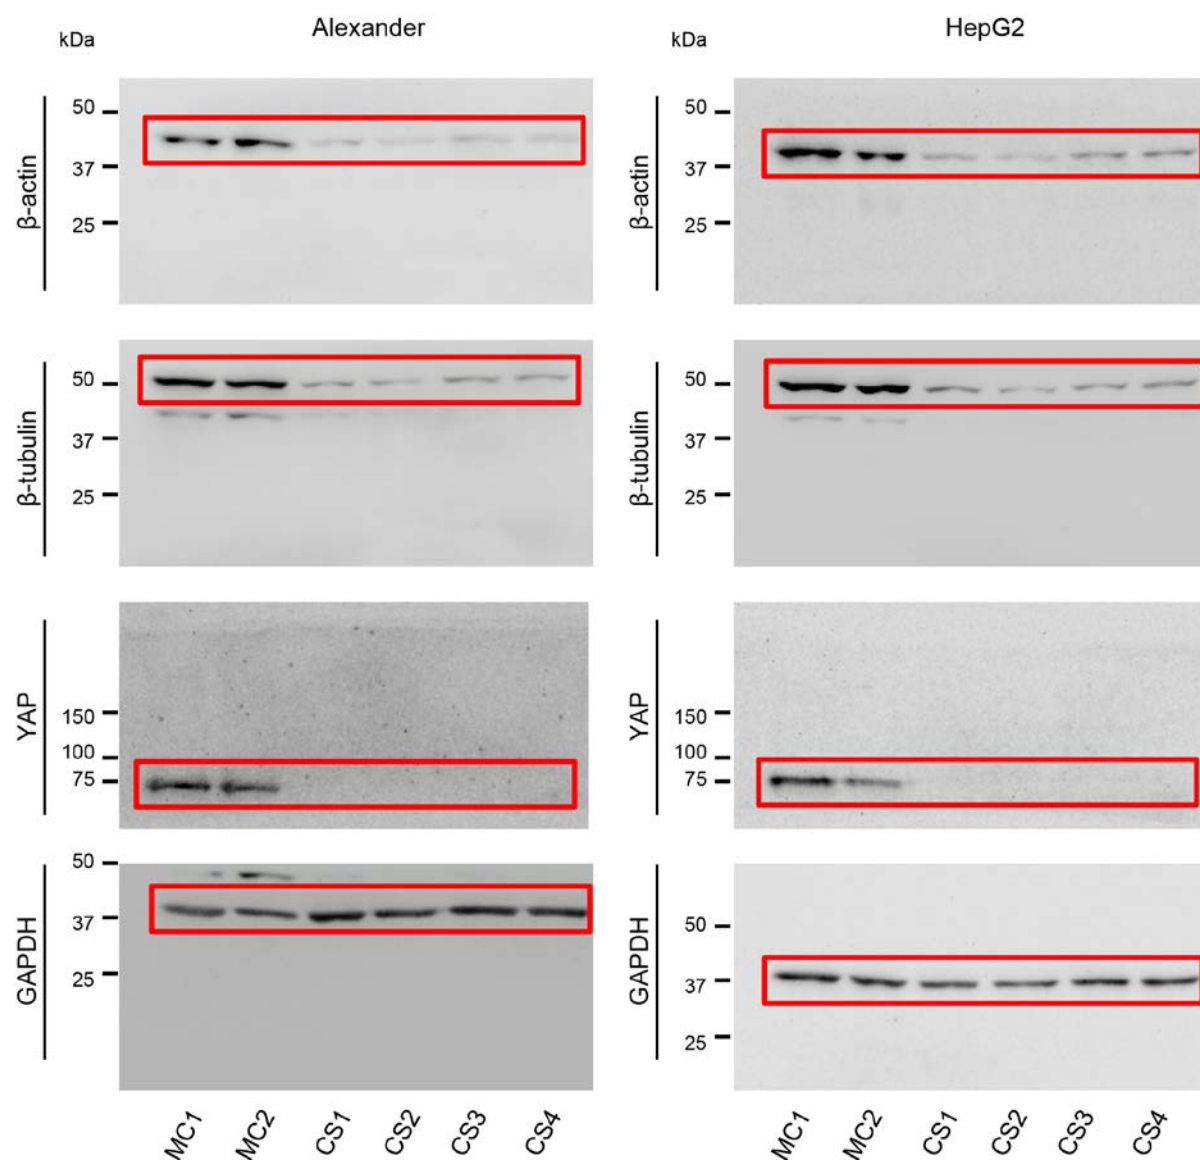

## Replicates for Figure 3F

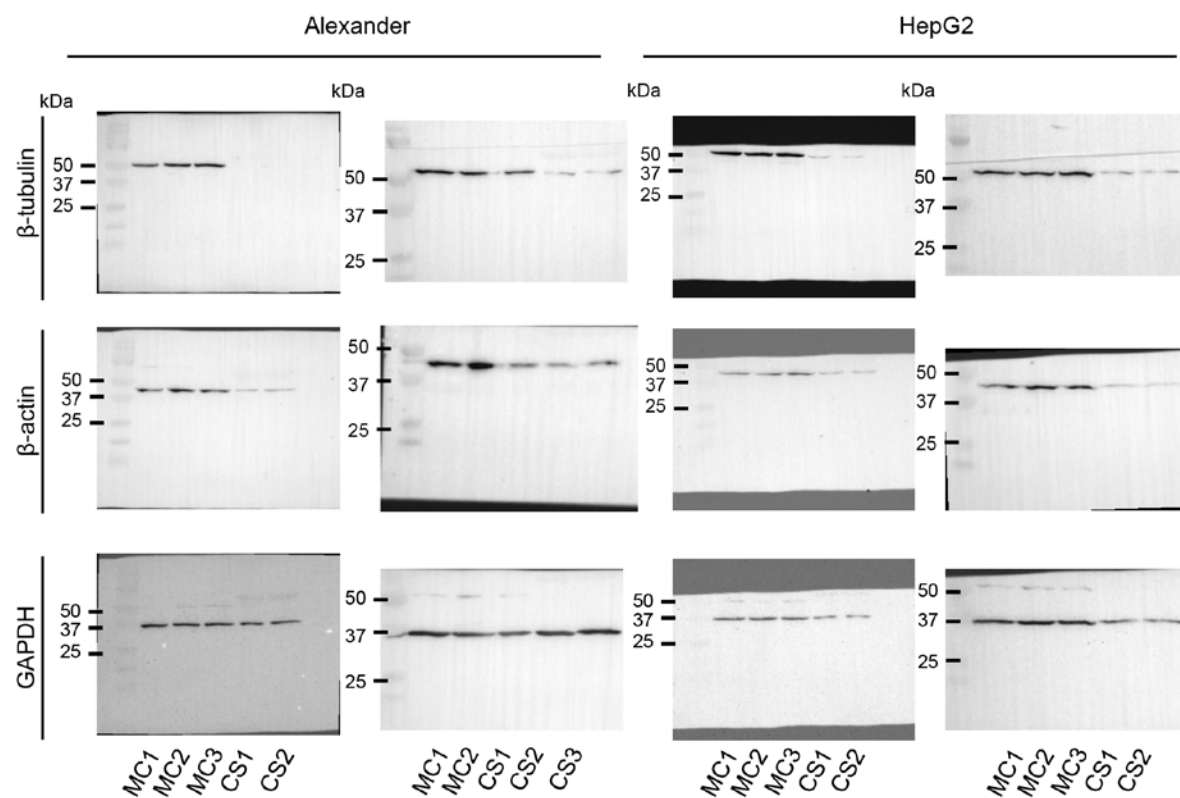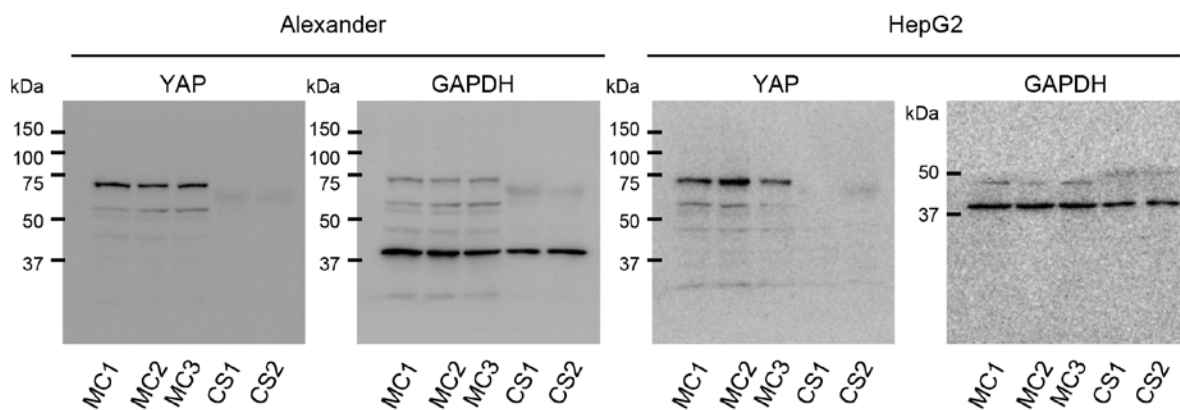

**Figure 5A**

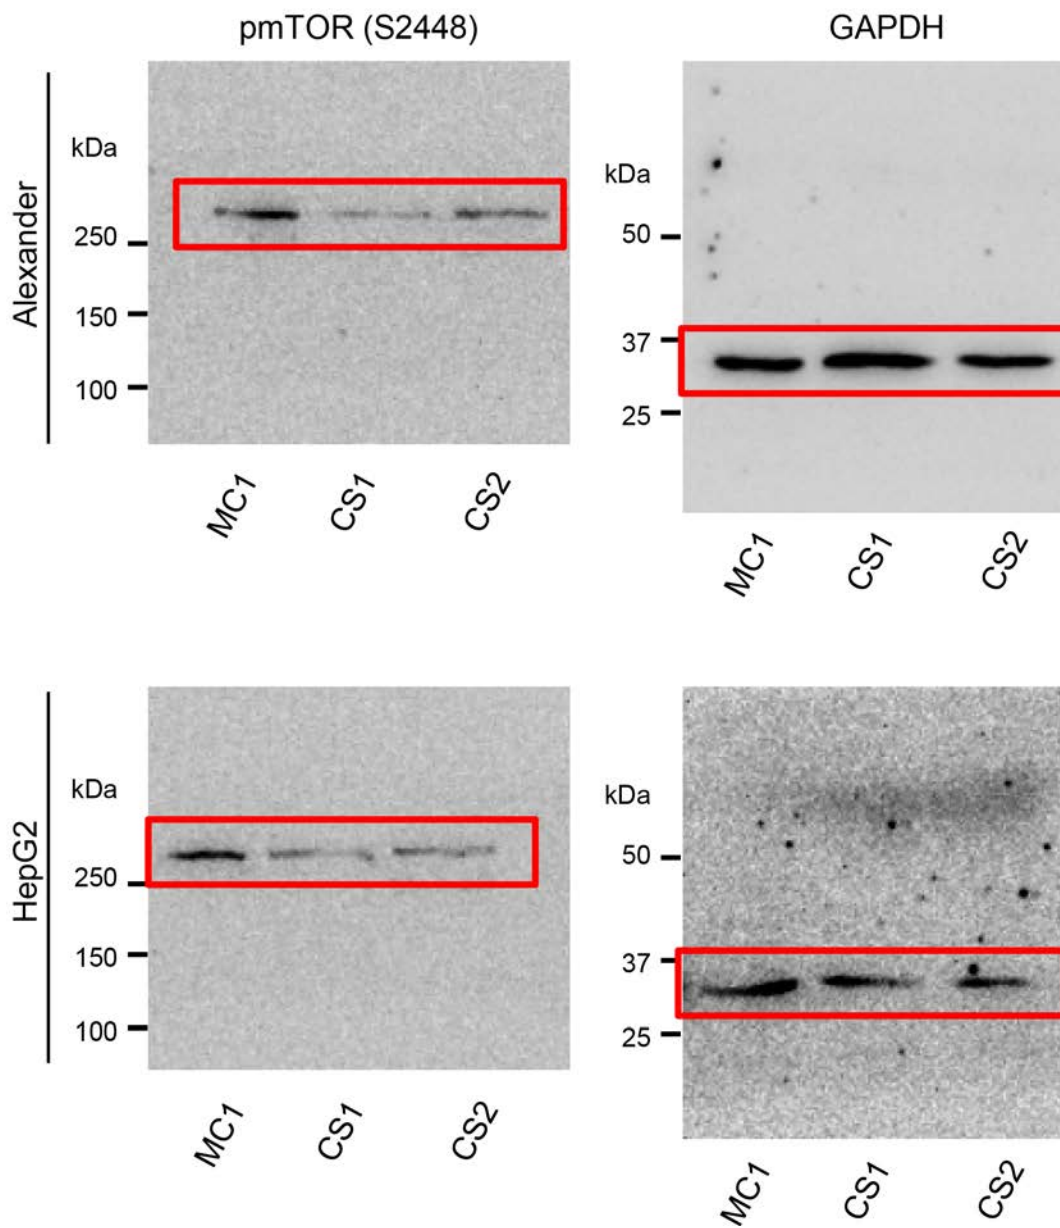



**Figure 6C**

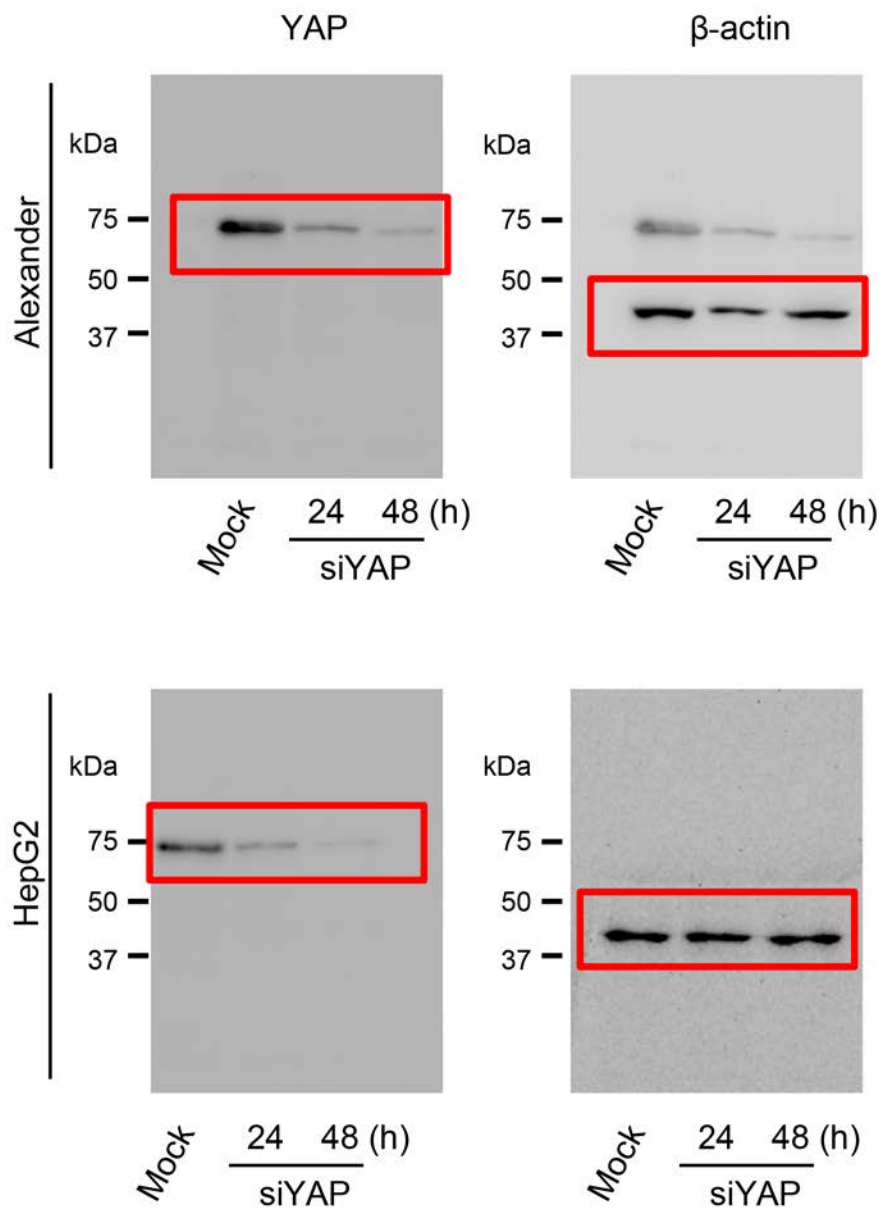

Figure 6E

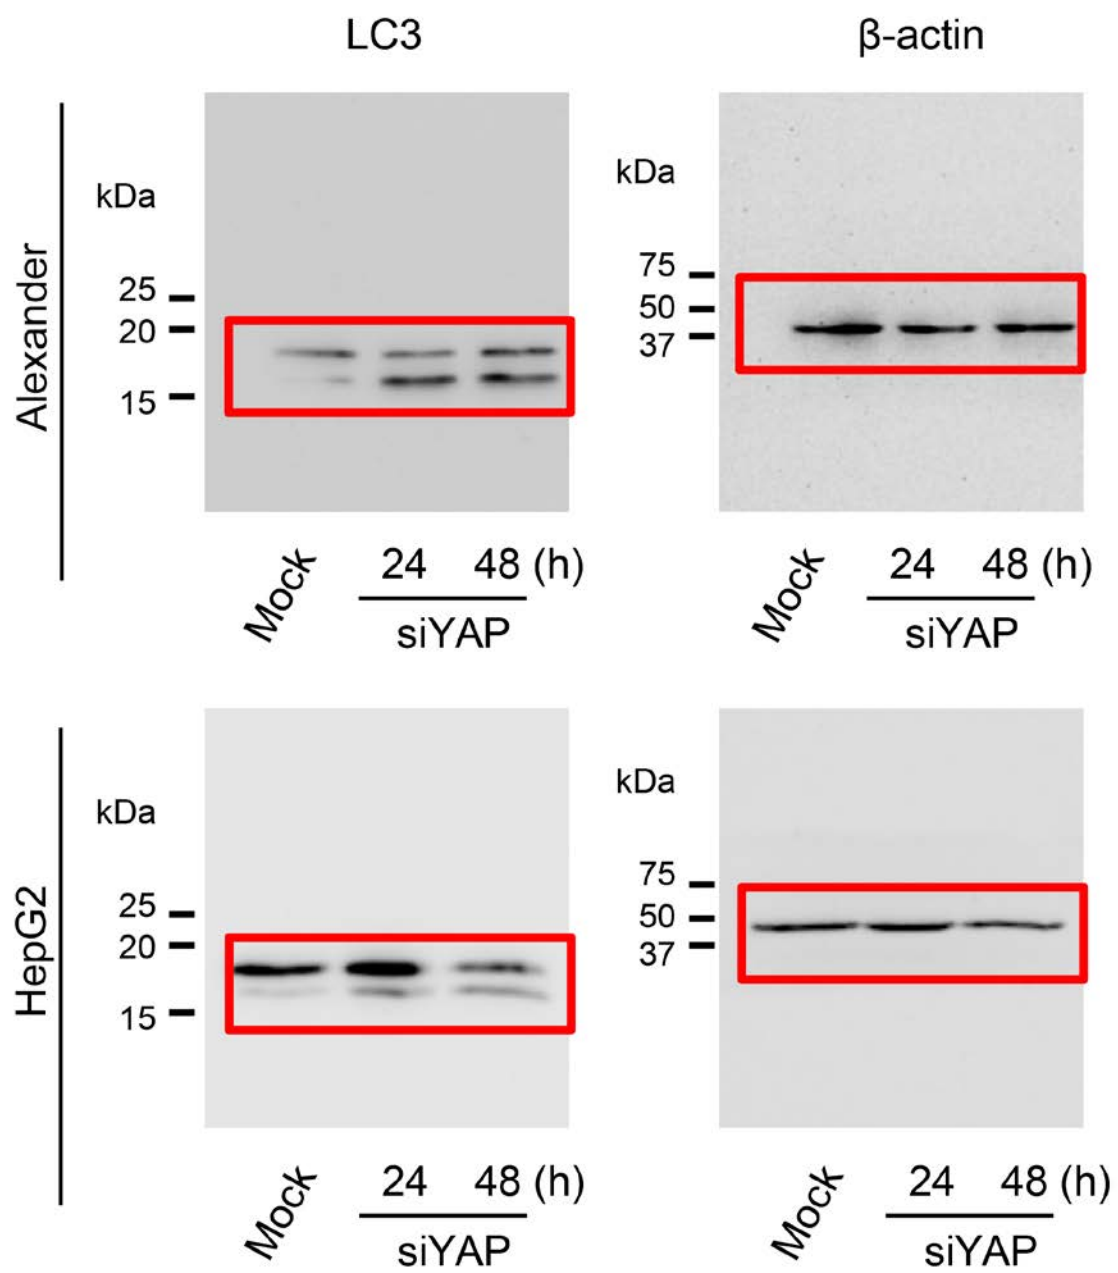

**Figure 7B**

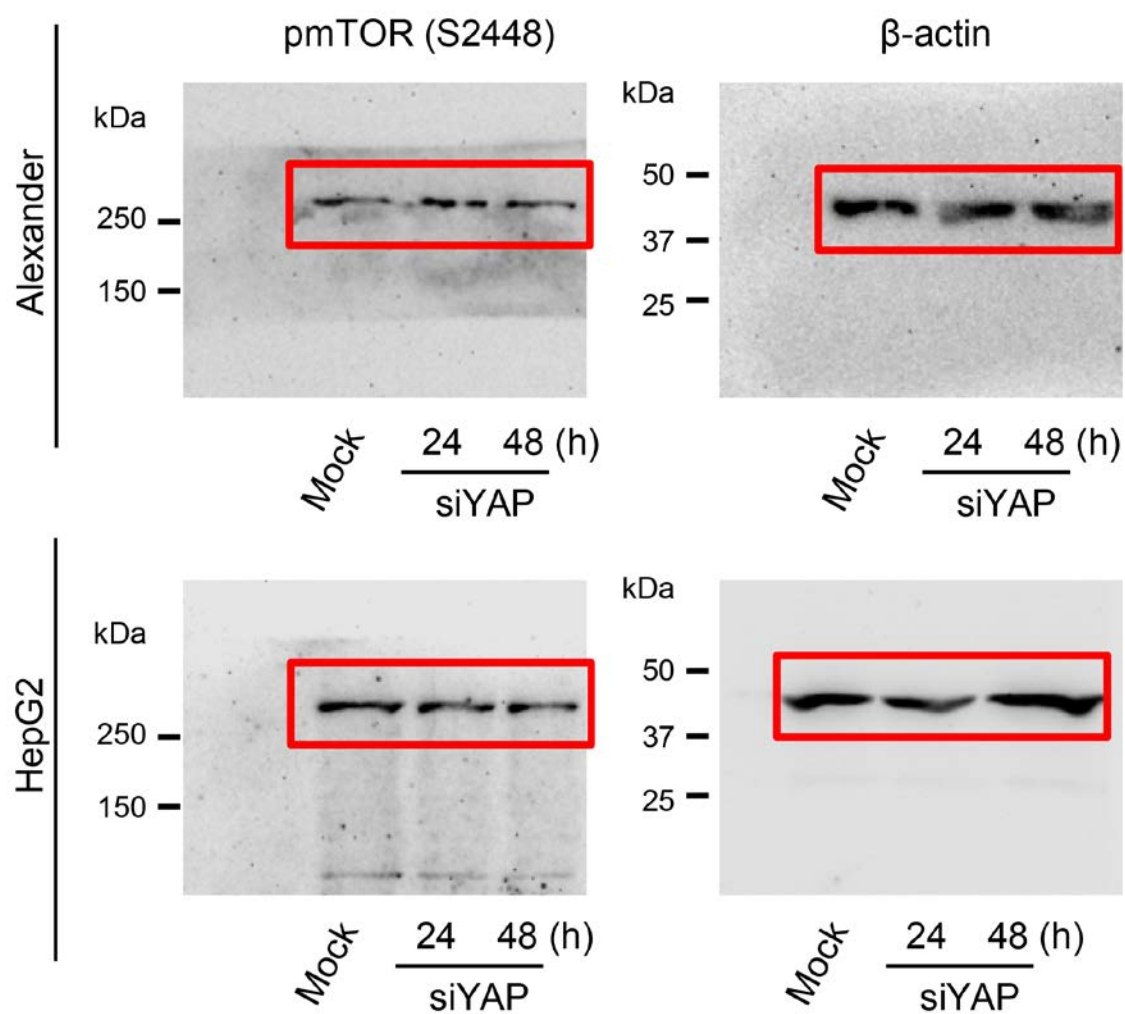

Supplement: s1 [file s1]
